# Supplementary material
Source: MDPI journal article supplement (https://www.mdpi.com/2673-7051/2/1/11)
Supplement: s1 [file s1]

**Table S1a.** Study population and demographic data (parents of children aged < 3 years). *Note:* # Chi-square test. ‡ independent *t*-test. \* significant result ( $p < 0.05$ ).

| Parents of children aged < 3 years    | Total       | At least 1 child in quarantine | Child/ children not in quarantine | p-value |
|---------------------------------------|-------------|--------------------------------|-----------------------------------|---------|
| n (%)                                 | 586 (100%)  | 469 (80.0)                     | 117 (20.0)                        |         |
| Sex n (%)                             |             |                                |                                   |         |
| Female                                | 342 (58.4%) | 278 (81.3%)                    | 64 (18.7%)                        | .369#   |
| Male                                  | 244 (41.6%) | 191 (78.3%)                    | 53 (21.7%)                        |         |
| Age (years)                           |             |                                |                                   |         |
| Mean (SD)                             |             | 35.8 (5.4)                     | 36.6 (4.9)                        | .203‡   |
| Partnership n (%)                     |             |                                |                                   |         |
| Yes                                   | 563 (96.9%) | 450 (79.9%)                    | 113 (20.1%)                       | .823#   |
| No                                    | 18 (3.1%)   | 14 (77.8%)                     | 4 (22.2%)                         |         |
| Reason for quarantine n (%)           |             |                                |                                   |         |
| Tested positive                       | 241 (41.1%) | 228 (94.6%)                    | 13 (5.4%)                         | <.001#* |
| Contactperson                         | 345 (58.9%) | 241 (69.9%)                    | 104 (30.1%)                       |         |
| Migration background n (%)            |             |                                |                                   |         |
| Yes                                   | 55 (9.5%)   | 51 (92.7%)                     | 4 (7.3%)                          | <.050#* |
| No                                    | 524 (90.5%) | 411 (78.4%)                    | 113 (21.6%)                       |         |
| Education level n (%)                 |             |                                |                                   |         |
| Low or middle                         | 90 (15.4%)  | 76 (84.4%)                     | 14 (15.6%)                        | .248#   |
| High                                  | 494 (84.6%) | 391 (79.1%)                    | 103 (20.9%)                       |         |
| Living situation n (%)                |             |                                |                                   |         |
| Garden or balcony                     | 523 (90.0%) | 409 (78.2%)                    | 114 (21.8%)                       | <.001#* |
| None                                  | 58 (10.0%)  | 56 (96.6%)                     | 2 (3.4%)                          |         |
| Quarantine interval (days)            |             |                                |                                   |         |
| n (%)                                 | 465 (79.4%) | 376 (80.9%)                    | 89 (19.1%)                        |         |
| Mean (SD)                             |             | 11.9 (4.0)                     | 11.2 (5.0)                        | .154‡   |
| Brief Resilience Scale                |             |                                |                                   |         |
| n (%)                                 | 462 (78.8%) | 366 (79.2%)                    | 96 (20.8%)                        |         |
| Mean (SD)                             |             | 3.8 (0.8)                      | 3.7 (0.8)                         | .763‡   |
| Coping Score                          |             |                                |                                   |         |
| n (%)                                 | 433 (73.9%) | 343 (79.2%)                    | 90 (20.8%)                        |         |
| Mean (SD)                             |             | 4.5 (0.9)                      | 4.6 (0.9)                         | .900‡   |
| Psychological distress score children |             |                                |                                   |         |
| n (%)                                 | 491 (83.8%) | 436 (88.8%)                    | 55 (11.2%)                        |         |
| Mean (SD)                             |             | 0.5 (0.7)                      | 0.4 (0.6)                         | .319‡   |

**Table S1b.** Study population and demographic data (parents of children aged 3 to < 6 years). *Note:* # Chi-square test. ‡ independent *t*-test. \* significant result ( $p < 0.05$ ).

| Parents of children aged 3-<6 years   | Total       | At least 1 child in quarantine | Child/ children not in quarantine | p-value |
|---------------------------------------|-------------|--------------------------------|-----------------------------------|---------|
| n (%)                                 | 576 (100%)  | 433 (75.2%)                    | 143 (24.8)                        |         |
| Sex n (%)                             |             |                                |                                   |         |
| Female                                | 349 (60.6%) | 257 (73.6%)                    | 92 (26.4%)                        | .290#   |
| Male                                  | 227 (39.4%) | 176 (77.5%)                    | 51 (22.5%)                        |         |
| Age (years)                           |             |                                |                                   |         |
| Mean (SD) in years                    |             | 38.7 (5.5)                     | 39.7 (5.4)                        | <.05‡*  |
| Partnership                           |             |                                |                                   |         |
| Yes                                   | 537 (94.5%) | 402 (74.9%)                    | 135 (25.1%)                       | .934#   |
| No                                    | 31 (5.5 %)  | 23 (74.2%)                     | 8 (25.8%)                         |         |
| Reason for quarantine n (%)           |             |                                |                                   |         |
| Tested positive                       | 233 (40.5%) | 224 (96.1%)                    | 9 (3.9%)                          | <.001#* |
| Contactperson                         | 343 (59.5%) | 209 (60.9%)                    | 134 (39.1%)                       |         |
| Migration background n (%)            |             |                                |                                   |         |
| Yes                                   | 44 (7.9%)   | 38 (86.4%)                     | 6 (13.6%)                         | .058#   |
| No                                    | 515 (92.1%) | 378 (73.4%)                    | 137 (26.6%)                       |         |
| Education level n (%)                 |             |                                |                                   |         |
| Low or middle                         | 86 (15.0%)  | 68 (79.1%)                     | 18 (20.9%)                        | .354#   |
| High                                  | 488 (85.0%) | 363 (74.4%)                    | 125 (25.6%)                       |         |
| Living situation n (%)                |             |                                |                                   |         |
| Garden or balcony                     | 551 (96.2%) | 416 (75.5%)                    | 135 (24.5%)                       | .436#   |
| None                                  | 22 (3.8%)   | 15 (68.2%)                     | 7 (31.8%)                         |         |
| Quarantine interval (days)            |             |                                |                                   |         |
| n (%)                                 | 488 (84.7%) | 367 (75.2%)                    | 121 (24.8%)                       |         |
| Mean (SD)                             |             | 11.8 (4.3)                     | 10.6 (3.5)                        | <.010‡* |
| Brief Resilience Scale                |             |                                |                                   |         |
| n (%)                                 | 482 (83.7%) | 355 (73.7%)                    | 127 (26.3%)                       |         |
| Mean (SD)                             |             | 3.7 (0.8)                      | 3.8 (0.8)                         | .218‡   |
| Coping Score                          |             |                                |                                   |         |
| n (%)                                 | 455 (79.0%) | 334 (73.4%)                    | 121 (26.6%)                       |         |
| Mean (SD)                             |             | 4.7 (0.9)                      | 4.6 (1.0)                         | .169‡   |
| Psychological distress score children |             |                                |                                   |         |
| n (%)                                 | 468 (81.2%) | 411 (87.8%)                    | 57 (12.2%)                        |         |
| Mean (SD)                             |             | 0.6 (0.7)                      | 0.5 (0.8)                         | .570‡   |

**Table S1c.** Study population and demographic data (parents of children aged 6 to < 10 years). *Note:* # Chi-square test. ‡ independent *t*-test. \* significant result ( $p < 0.05$ ).

| Parents of children aged 6-<10 years  | Total             | At least 1 child in quarantine | Child/ children not in quarantine | p-value |
|---------------------------------------|-------------------|--------------------------------|-----------------------------------|---------|
| <b>n (%)</b>                          | <b>679 (100%)</b> | <b>508 (74.8%)</b>             | <b>171 (25.2)</b>                 |         |
| Sex n (%)                             |                   |                                |                                   |         |
| Female                                | 392 (57.7%)       | 294 (75.0%)                    | 98 (25.0%)                        | .897#   |
| Male                                  | 287 (42.3%)       | 214 (74.6 %)                   | 73 (25.4%)                        |         |
| Age (years)                           |                   |                                |                                   |         |
| Mean (SD)                             |                   | 42.4 (6.0)                     | 42.5 (5.4)                        | .814‡   |
| Partnership                           |                   |                                |                                   |         |
| Yes                                   | 607 (92.0%)       | 449 (74.0%)                    | 158 (26.0%)                       | .251#   |
| No                                    | 53 (8.0%)         | 43 (81.1%)                     | 10 (18.9%)                        |         |
| Reason for quarantine n (%)           |                   |                                |                                   |         |
| Tested positive                       | 296 (43.6%)       | 281 (94.9%)                    | 15 (5.1%)                         | <.001#* |
| Contactperson                         | 383 (56.4%)       | 227 (59.3%)                    | 156 (40.7%)                       |         |
| Migration background n (%)            |                   |                                |                                   |         |
| Yes                                   | 40 (6.1%)         | 34 (85.0%)                     | 6 (15.0%)                         | .127#   |
| No                                    | 620 (93.9%)       | 460 (74.2%)                    | 160 (25.8%)                       |         |
| Education level n (%)                 |                   |                                |                                   |         |
| Low or middle                         | 120 (17.8%)       | 99 (82.5%)                     | 21 (17.5%)                        | <.050#* |
| High                                  | 555 (82.2%)       | 405 (73.0%)                    | 150 (27.0%)                       |         |
| Living situation n (%)                |                   |                                |                                   |         |
| Garden or balcony                     | 642 (95.0 %)      | 480 (74.8%)                    | 162 (25.2%)                       | .823#   |
| None                                  | 34 (5.0%)         | 26 (76.5%)                     | 8 (23.5%)                         |         |
| Quarantine interval (days)            |                   |                                |                                   |         |
| n (%)                                 | 562 (82.8%)       | 436 (77.6%)                    | 126 (22.4%)                       |         |
| Mean (SD)                             |                   | 11.9 (4.5)                     | 11.1 (3.8)                        | .090‡   |
| Brief Resilience Scale                |                   |                                |                                   |         |
| n (%)                                 | 574 (84.5%)       | 435 (75.8%)                    | 139 (24.2%)                       |         |
| Mean (SD)                             |                   | 3.6 (0.8)                      | 3.8 (0.8)                         | <.050‡* |
| Coping Score                          |                   |                                |                                   |         |
| n (%)                                 | 559 (82.3%)       | 424 (75.8%)                    | 135 (24.2%)                       |         |
| Mean (SD)                             |                   | 4.7 (0.9)                      | 4.8 (1.0)                         | .116‡   |
| Psychological distress score children |                   |                                |                                   |         |
| n (%)                                 | 524 (77.2%)       | 474 (90.5%)                    | 50 (9.5%)                         |         |
| Mean (SD)                             |                   | 0.7 (0.8)                      | 0.4 (0.7)                         | <.010‡* |

**Table S1d.** Study population and demographic data (parents of children aged 10 to < 14 years). *Note:* # Chi-square test. ‡ independent *t*-test. \* significant result ( $p < 0.05$ ).

| Parents of children aged 10-<14 years | Total       | At least 1 child in quarantine | Child/ children not in quarantine | p-value |
|---------------------------------------|-------------|--------------------------------|-----------------------------------|---------|
| n (%)                                 | 718 (100%)  | 512 (71.3%)                    | 206 (28.7%)                       |         |
| Sex n (%)                             |             |                                |                                   |         |
| Female                                | 440 (61.3%) | 321 (73.0%)                    | 119 (27.0%)                       | .220#   |
| Male                                  | 278 (38.7%) | 191 (68.7%)                    | 87 (31.3%)                        |         |
| Age (years)                           |             |                                |                                   |         |
| Mean (SD)                             |             | 46.0 (5.8)                     | 46.2 (6.9)                        | .629‡   |
| Partnership                           |             |                                |                                   |         |
| Yes                                   | 638 (90.6%) | 458 (71.8%)                    | 180 (28.2%)                       | 0.720#  |
| No                                    | 66 (9.4%)   | 46 (69.7%)                     | 20 (30.3%)                        |         |
| Reason for quarantine n (%)           |             |                                |                                   |         |
| Tested positive                       | 293 (40.8%) | 274 (93.5%)                    | 19 (6.5%)                         | <.001#* |
| Contactperson                         | 425 (59.2%) | 238 (56.0%)                    | 187 (44.0%)                       |         |
| Migration background n (%)            |             |                                |                                   |         |
| Yes                                   | 50 (7.2%)   | 39 (78.0%)                     | 11 (22.0%)                        | .252#   |
| No                                    | 641 (92.8%) | 451 (70.4%)                    | 190 (29.6%)                       |         |
| Education level n (%)                 |             |                                |                                   |         |
| Low or middle                         | 140 (19.6%) | 111 (79.3%)                    | 29 (20.7%)                        | <.050#* |
| High                                  | 574 (80.4%) | 399 (69.5%)                    | 175 (30.5%)                       |         |
| Living situation n (%)                |             |                                |                                   |         |
| Garden or balcony                     | 686 (95.7%) | 490 (71.4%)                    | 196 (28.6%)                       | .657#   |
| None                                  | 31 (4.3%)   | 21 (67.7%)                     | 10 (32.3%)                        |         |
| Quarantine interval (days)            |             |                                |                                   |         |
| n (%)                                 | 588 (81.9%) | 433 (73.6%)                    | 155 (26.4%)                       | <.010‡* |
| Mean (SD)                             |             | 12.3 (4.6)                     | 11.2 (3.7)                        |         |
| Brief Resilience Scale                |             |                                |                                   |         |
| n (%)                                 | 618 (86.1%) | 444 (71.8%)                    | 174 (28.2%)                       |         |
| Mean (SD)                             |             | 3.8 (0.7)                      | 3.8 (0.8)                         | .971‡   |
| Coping Score                          |             |                                |                                   |         |
| n (%)                                 | 592 (82.4%) | 425 (71.8%)                    | 167 (28.2%)                       |         |
| Mean (SD)                             |             | 4.8 (0.9)                      | 4.9 (0.8)                         | .088‡   |
| Psychological distress score children |             |                                |                                   |         |
| n (%)                                 | 537 (74.8%) | 475 (88.5%)                    | 62 (11.5%)                        |         |
| Mean (SD)                             |             | 0.6 (0.7)                      | 0.6 (0.8)                         | .473‡   |

**Table S1e.** Study population and demographic data (parents of children aged 14 to < 16 years). *Note:* # Chi-square test. ‡ independent *t*-test. \* significant result ( $p < 0.05$ ).

| Parents of children aged 14-<16 years | Total       | At least 1 child in quarantine | Child/ children not in quarantine | p-value |
|---------------------------------------|-------------|--------------------------------|-----------------------------------|---------|
| n (%)                                 | 417 (100%)  | 303 (72.7%)                    | 114 (27.3%)                       |         |
| Sex n (%)                             |             |                                |                                   |         |
| Female                                | 263 (63.1%) | 186 (70.7%)                    | 77 (29.3%)                        | .246#   |
| Male                                  | 154 (36.9%) | 117 (76.0%)                    | 37 (24.0%)                        |         |
| Age (years)                           |             |                                |                                   |         |
| Mean (SD)                             |             | 48.6 (5.5)                     | 48.2 (4.6)                        | .235‡   |
| Partnership                           |             |                                |                                   |         |
| Yes                                   | 358 (88.8%) | 259 (72.3%)                    | 99 (27.7%)                        | .649#   |
| No                                    | 45 (11.2%)  | 34 (75.6%)                     | 11 (24.4%)                        |         |
| Reason for quarantine n (%)           |             |                                |                                   |         |
| Tested positive                       | 173 (41.5%) | 163 (94.2%)                    | 10 (5.8%)                         | <.001#* |
| Contactperson                         | 244 (58.5%) | 140 (57.4%)                    | 104 (42.6%)                       |         |
| Migration background n (%)            |             |                                |                                   |         |
| Yes                                   | 32 (8.0%)   | 29 (90.6%)                     | 3 (9.4%)                          | <.050#* |
| No                                    | 366 (92.0%) | 261 (71.3%)                    | 105 (28.7%)                       |         |
| Education level n (%)                 |             |                                |                                   |         |
| Low or middle                         | 81 (19.7%)  | 67 (82.7%)                     | 14 (17.3%)                        | <.050#* |
| High                                  | 330 (80.3%) | 232 (70.3%)                    | 98 (29.7%)                        |         |
| Living situation n (%)                |             |                                |                                   |         |
| Garden or balcony                     | 403 (96.9%) | 290 (72.0%)                    | 113 (28.0%)                       | .105#   |
| None                                  | 13 (3.1%)   | 12 (92.3%)                     | 1 (7.7%)                          |         |
| Quarantine interval (days)            |             |                                |                                   |         |
| n (%)                                 | 345 (82.7%) | 260 (75.4%)                    | 85 (24.6%)                        |         |
| Mean (SD)                             |             | 12.4 (4.6)                     | 9.9 (4.3)                         | <.001‡* |
| Brief Resilience Scale                |             |                                |                                   |         |
| n (%)                                 | 358 (85.9%) | 261 (72.9%)                    | 97 (27.1%)                        |         |
| Mean (SD)                             |             | 3.7 (0.8)                      | 3.8 (0.8)                         | .415‡   |
| Psychological distress score          |             |                                |                                   |         |
| n (%)                                 | 349 (83.7%) | 256 (73.4%)                    | 93 (26.6%)                        |         |
| Mean (SD)                             |             | 0.9 (0.7)                      | 0.8 (0.7)                         | .774‡   |
| Coping Score                          |             |                                |                                   |         |
| n (%)                                 | 351 (84.2%) | 257 (73.2%)                    | 94 (26.8%)                        |         |
| Mean (SD)                             |             | 4.8 (0.9)                      | 4.7 (0.9)                         | .712‡   |
| Psychological distress score children |             |                                |                                   |         |
| n (%)                                 | 311 (74.6%) | 285 (91.6%)                    | 26 (8.4%)                         |         |
| Mean (SD)                             |             | 0.6 (0.7)                      | 0.4 (0.8)                         | .153‡   |

**Table S2.** Psychological items (1-4) children. *Note:* # Chi-square test. \* significant result ( $p < 0.05$ ).

| Items                                                                           | Total       | Never       | 1-2 days    | 3-4 days    | 5-7 days  | p-value # |
|---------------------------------------------------------------------------------|-------------|-------------|-------------|-------------|-----------|-----------|
| <b>Child/ren felt nervous, anxious or on edge during the quarantine period.</b> |             |             |             |             |           |           |
| <u>Children aged &lt;3 years n (%)</u>                                          | 513 (100%)  | 350 (68.2%) | 50 (9.7%)   | 83 (16.2%)  | 30 (5.8%) |           |
| At least 1 child in quarantine                                                  | 456 (88.9%) | 309 (67.8%) | 45 (9.9%)   | 74 (16.2%)  | 28 (6.1%) | .850      |
| Child/ren not in quarantine                                                     | 57 (11.1%)  | 41 (71.9%)  | 5 (8.8%)    | 9 (15.8%)   | 2 (3.5%)  |           |
| <u>Children aged 3-&lt;6 years n (%)</u>                                        | 490 (100%)  | 313 (63.9%) | 62 (12.7%)  | 84 (17.1%)  | 31 (6.3%) |           |
| At least 1 child in quarantine                                                  | 428 (87.3%) | 271 (63.3%) | 56 (13.1%)  | 76 (17.8%)  | 25 (5.8%) | .446      |
| Child/ren not in quarantine                                                     | 62 (12.7%)  | 42 (67.7%)  | 6 (9.7%)    | 8 (12.9%)   | 6 (9.7%)  |           |
| <u>Children aged 6-&lt;10 years n (%)</u>                                       | 545 (100%)  | 330 (60.6%) | 67 (12.3%)  | 97 (17.8%)  | 51 (9.4%) |           |
| At least 1 child in quarantine                                                  | 493 (90.5%) | 289 (58.6%) | 65 (13.2%)  | 90 (18.3%)  | 49 (9.9%) | <.050*    |
| Child/ren not in quarantine                                                     | 52 (9.5%)   | 41 (78.8%)  | 2 (3.8%)    | 7 (13.5%)   | 2 (3.8%)  |           |
| <u>Children aged 10-&lt;14 years n (%)</u>                                      | 555 (100%)  | 349 (62.9%) | 82 (14.8%)  | 90 (16.2%)  | 34 (6.1%) |           |
| At least 1 child in quarantine                                                  | 491 (88.5%) | 307 (62.5%) | 72 (14.7%)  | 82 (16.7%)  | 30 (6.1%) | .864      |
| Child/ren not in quarantine                                                     | 64 (11.5%)  | 42 (65.6%)  | 10 (15.6%)  | 8 (12.5%)   | 4 (6.3%)  |           |
| <u>Children aged 14-&lt;16 years n (%)</u>                                      | 325 (100%)  | 221 (68.0%) | 43 (13.2%)  | 45 (13.8%)  | 16 (4.9%) |           |
| At least 1 child in quarantine                                                  | 295 (90.8%) | 197 (66.8%) | 42 (14.2%)  | 41 (13.9%)  | 15 (5.1%) | .344      |
| Child/ren not in quarantine                                                     | 30 (9.2%)   | 24 (80.0%)  | 1 (3.3%)    | 4 (13.3%)   | 1 (3.3%)  |           |
| <b>Child/ren felt down or depressed during the quarantine period.</b>           |             |             |             |             |           |           |
| <u>Children aged &lt;3 years n (%)</u>                                          | 503 (100%)  | 351 (69.8%) | 59 (11.7%)  | 72 (14.3%)  | 21 (4.2%) |           |
| At least 1 child in quarantine                                                  | 446 (88.7%) | 307 (68.8%) | 51 (11.4%)  | 69 (15.5%)  | 19 (4.3%) | .208      |
| Child/ren not in quarantine                                                     | 57 (11.3%)  | 44 (77.2%)  | 8 (14.0%)   | 3 (5.3%)    | 2 (3.5%)  |           |
| <u>Children aged 3-&lt;6 years n (%)</u>                                        | 479 (100%)  | 290 (60.5%) | 83 (17.3%)  | 80 (16.7%)  | 26 (5.4%) |           |
| At least 1 child in quarantine                                                  | 419 (87.5%) | 249 (59.4%) | 76 (18.1%)  | 75 (17.9%)  | 19 (4.5%) | <.050*    |
| Child/ren not in quarantine                                                     | 60 (12.5%)  | 41 (68.3%)  | 7 (11.7%)   | 5 (8.3%)    | 7 (11.7%) |           |
| <u>Children aged 6-&lt;10 years n (%)</u>                                       | 535 (100%)  | 304 (56.8%) | 84 (15.7%)  | 103 (19.3%) | 44 (8.2%) |           |
| At least 1 child in quarantine                                                  | 484 (90.5%) | 268 (55.4%) | 79 (16.3%)  | 94 (19.4%)  | 43 (8.9%) | .117      |
| Child/ren not in quarantine                                                     | 51 (9.5%)   | 36 (70.6%)  | 5 (9.8%)    | 9 (17.6%)   | 1 (2.0%)  |           |
| <u>Children aged 10-&lt;14 years n (%)</u>                                      | 555 (100%)  | 310 (55.9%) | 104 (18.7%) | 109 (19.6%) | 32 (5.8%) |           |
| At least 1 child in quarantine                                                  | 489 (88.1%) | 266 (54.4%) | 99 (20.2%)  | 93 (19.0%)  | 31 (6.3%) | <.050*    |
| Child/ren not in quarantine                                                     | 66 (11.9%)  | 44 (66.7%)  | 5 (7.6%)    | 16 (24.2%)  | 1 (1.5%)  |           |
| <u>Children aged 14-&lt;16 years n (%)</u>                                      | 320 (100%)  | 179 (55.9%) | 59 (18.4%)  | 54 (16.9%)  | 28 (8.8%) |           |
| At least 1 child in quarantine                                                  | 291 (90.9%) | 158 (54.3%) | 56 (19.2%)  | 51 (17.5%)  | 26 (8.9%) | .307      |
| Child/ren not in quarantine                                                     | 29 (9.1%)   | 21 (72.4%)  | 3 (10.3%)   | 3 (10.3%)   | 2 (6.9%)  |           |
| <b>Child/ren felt lonely during the quarantine period.</b>                      |             |             |             |             |           |           |
| <u>Children aged &lt;3 years n (%)</u>                                          | 504 (100%)  | 328 (65.1%) | 49 (9.7%)   | 83 (16.5%)  | 44 (8.7%) |           |
| At least 1 child in quarantine                                                  | 447 (88.7%) | 292 (65.3%) | 43 (9.6%)   | 71 (15.9%)  | 41 (9.2%) | .618      |
| Child/ren not in quarantine                                                     | 57 (11.3%)  | 36 (63.2%)  | 6 (10.5%)   | 12 (14.5%)  | 3 (6.8%)  |           |

|                                            |             |             |            |             |            |        |
|--------------------------------------------|-------------|-------------|------------|-------------|------------|--------|
| <u>Children aged 3-&lt;6 years n (%)</u>   | 482 (100%)  | 246 (51.0%) | 71 (14.7%) | 109 (22.6%) | 56 (11.6%) |        |
| At least 1 child in quarantine             | 423 (87.8%) | 210 (49.6%) | 63 (14.9%) | 101 (23.9%) | 49 (11.6%) | .282   |
| Child/ren not in quarantine                | 59 (12.2%)  | 36 (61.0%)  | 8 (13.6%)  | 8 (13.6%)   | 7 (11.9%)  |        |
| <u>Children aged 6-&lt;10 years n (%)</u>  | 544 (100%)  | 265 (48.7%) | 83 (15.3%) | 115 (21.1%) | 81 (14.9%) |        |
| At least 1 child in quarantine             | 493 (90.6%) | 229 (46.5%) | 77 (15.6%) | 108 (21.9%) | 79 (16.0%) | <.010* |
| Child/ren not in quarantine                | 51 (9.4%)   | 36 (70.6%)  | 6 (11.8%)  | 7 (13.7%)   | 2 (3.9%)   |        |
| <u>Children aged 10-&lt;14 years n (%)</u> | 559 (100%)  | 279 (49.9%) | 84 (15.0%) | 135 (24.2%) | 61 (10.9%) |        |
| At least 1 child in quarantine             | 495 (88.6%) | 244 (49.3%) | 76 (15.4%) | 123 (24.8%) | 52 (10.5%) | .538   |
| Child/ren not in quarantine                | 64 (11.4%)  | 35 (54.7%)  | 8 (12.5%)  | 12 (18.8%)  | 9 (14.1%)  |        |
| <u>Children aged 14-&lt;16 years n (%)</u> | 323 (100%)  | 159 (49.2%) | 60 (18.6%) | 71 (22.0%)  | 33 (10.2%) |        |
| At least 1 child in quarantine             | 294 (91.0%) | 138 (46.9%) | 58 (19.7%) | 68 (23.1%)  | 30 (10.2%) | .051   |
| Child/ren not in quarantine                | 29 (9.0%)   | 21 (72.4%)  | 2 (6.9%)   | 3 (10.3%)   | 3 (10.3%)  |        |

---

**The quarantine period triggered physical reactions in the child/ren, such as sweating, shortness of breath or palpitations.**

|                                            |             |             |           |           |          |      |
|--------------------------------------------|-------------|-------------|-----------|-----------|----------|------|
| <u>Children aged &lt;3 years n (%)</u>     | 505 (100%)  | 472 (93.5%) | 15 (3.0%) | 10 (2.0%) | 8 (1.6%) |      |
| At least 1 child in quarantine             | 449 (88.9%) | 418 (93.1%) | 14 (3.1%) | 9 (8.9%)  | 8 (7.1%) | .713 |
| Child/ren not in quarantine                | 56 (11.1%)  | 54 (96.4%)  | 1 (1.8%)  | 1 (1.8%)  | 0 (0.0%) |      |
| <u>Children aged 3-&lt;6 years n (%)</u>   | 479 (100%)  | 452 (94.4%) | 15 (3.1%) | 8 (1.7%)  | 4 (0.8%) |      |
| At least 1 child in quarantine             | 420 (87.7%) | 396 (94.3%) | 13 (3.1%) | 7 (1.7%)  | 4 (1.0%) | .901 |
| Child/ren not in quarantine                | 59 (12.3%)  | 56 (94.9%)  | 2 (3.4%)  | 1 (1.7%)  | 0 (0.0%) |      |
| <u>Children aged 6-&lt;10 years n (%)</u>  | 537 (100%)  | 493 (91.8%) | 24 (4.5%) | 15 (2.8%) | 5 (0.9%) |      |
| At least 1 child in quarantine             | 487 (90.7%) | 446 (91.6%) | 22 (4.5%) | 15 (3.1%) | 4 (0.8%) | .518 |
| Child/ren not in quarantine                | 50 (9.3%)   | 47 (94.0%)  | 2 (4.0%)  | 0 (0.0%)  | 1 (2.0%) |      |
| <u>Children aged 10-&lt;14 years n (%)</u> | 550 (100%)  | 493 (89.6%) | 31 (5.6%) | 21 (3.8%) | 5 (0.9%) |      |
| At least 1 child in quarantine             | 487 (88.5%) | 436 (89.5%) | 29 (6.0%) | 19 (3.9%) | 3 (0.6%) | .185 |
| Child/ren not in quarantine                | 63 (11.5%)  | 57 (90.5%)  | 2 (3.2%)  | 2 (3.2%)  | 2 (3.2%) |      |
| <u>Children aged 14-&lt;16 years n (%)</u> | 318 (100%)  | 277 (87.1%) | 26 (8.2%) | 9 (2.8%)  | 6 (1.9%) |      |
| At least 1 child in quarantine             | 291 (91.5%) | 254 (87.3%) | 23 (7.9%) | 8 (2.7%)  | 6 (2.1%) | .811 |
| Child/ren not in quarantine                | 27 (8.5%)   | 23 (85.2%)  | 3 (11.1%) | 1 (3.7%)  | 0 (0.0%) |      |

---

**Table S3a.** Free-text answers; coping with the lack of care services, social contacts and leisure activities for their children.

| Age group        | Evaluation      | Lack of care services |       | Missing social contacts |       | Missing leisure activities |       |
|------------------|-----------------|-----------------------|-------|-------------------------|-------|----------------------------|-------|
|                  |                 | n                     | %     | n                       | %     | n                          | %     |
| < 3 years        | Rather positive | 88                    | 33,0  | 246                     | 76,4  | 175                        | 76,8  |
|                  | Moderate        | 65                    | 24,3  | 30                      | 9,3   | 11                         | 4,8   |
|                  | Rather negative | 114                   | 42,7  | 46                      | 14,3  | 42                         | 18,4  |
|                  | Total           | 267                   | 100,0 | 322                     | 100,0 | 228                        | 100,0 |
| 3 to < 6 years   | Rather positive | 118                   | 30,6  | 332                     | 84,5  | 270                        | 83,1  |
|                  | Moderate        | 62                    | 16,1  | 5                       | 1,3   | 5                          | 1,5   |
|                  | Rather negative | 206                   | 53,4  | 56                      | 14,2  | 50                         | 15,4  |
|                  | Total           | 386                   | 100,0 | 393                     | 100,0 | 325                        | 100,0 |
| 6 to < 10 years  | Rather positive | 92                    | 26,0  | 350                     | 83,9  | 328                        | 80,8  |
|                  | Moderate        | 44                    | 12,4  | 8                       | 1,9   | 8                          | 2,0   |
|                  | Rather negative | 218                   | 61,6  | 59                      | 14,1  | 70                         | 17,2  |
|                  | Total           | 354                   | 100,0 | 417                     | 100,0 | 406                        | 100,0 |
| 10 to < 14 years | Rather positive | 86                    | 36,3  | 326                     | 80,1  | 320                        | 76,7  |
|                  | Moderate        | 19                    | 8,0   | 10                      | 2,5   | 16                         | 3,8   |
|                  | Rather negative | 132                   | 55,7  | 71                      | 17,4  | 81                         | 19,4  |
|                  | Total           | 237                   | 100,0 | 407                     | 100,0 | 417                        | 100,0 |
| 14 to < 16 years | Rather positive | 48                    | 46,2  | 165                     | 83,3  | 150                        | 76,9  |
|                  | Moderate        | 31                    | 29,8  | 11                      | 5,6   | 0                          | 0,0   |
|                  | Rather negative | 25                    | 24,0  | 22                      | 11,1  | 45                         | 23,1  |
|                  | Total           | 104                   | 100,0 | 198                     | 100,0 | 195                        | 100,0 |



**Table S3b.** Free-text answers; coping with the lack of care services, detailed. *Note:* \* significant result ( $p < 0.05$ ). <sup>a</sup> the assessment was made according to the overall judgement of the statement in the case of several answers.

| Our Assessment <sup>a</sup> | Lack of care services                                                   | < 3 years      |               | 3 to < 6 years |               | 6 to < 10 years |               | 10 to < 14 years |               | 14 to < 16 years |              | Total          |                |
|-----------------------------|-------------------------------------------------------------------------|----------------|---------------|----------------|---------------|-----------------|---------------|------------------|---------------|------------------|--------------|----------------|----------------|
|                             |                                                                         | Yes            | No            | Yes            | No            | Yes             | No            | Yes              | No            | Yes              | No           | Yes            | No             |
|                             | At least one child in quarantine?<br>N (multiple answers were possible) | 222            | 42            | 290            | 95            | 281             | 72            | 173              | 60            | 91               | 14           | 1057           | 283            |
| Positive                    | Parents took care (no additional workload)                              | 47<br>(21.2%)  | 11<br>(26.2%) | 45<br>(15.5%)  | 14<br>(14.7%) | 31<br>(11.0%)   | 8<br>(11.1%)  | 28<br>(16.2%)    | 16<br>(26.7%) | 11<br>(12.1%)    | 2<br>(14.3%) | 162<br>(15.3%) | 51<br>(18.0%)  |
|                             | Friends and/or family members took care                                 | 8<br>(3.6%)    | 2<br>(4.8%)   | 12<br>(4.1%)   | 6<br>(6.3%)   | 21<br>(7.5%)    | 4<br>(5.6%)   | 7<br>(4.0%)      | 1<br>(1.7%)   | 1<br>(1.1%)      | 1<br>(7.1%)  | 49<br>(4.6%)   | 14<br>(4.9%)   |
|                             | Activities with the family (indoors)                                    | 22<br>(1.0%)   | 0<br>(0.0%)   | 53<br>(18.3%)  | 11<br>(11.6%) | 21<br>(7.5%)    | 7<br>(9.7%)   | 13<br>(7.5%)     | 3<br>(5.0%)   | 7<br>(7.7%)      | 1<br>(7.1%)  | 116<br>(11.0%) | 22<br>(7.8%)   |
|                             | Activities with the family (outdoors)                                   | 8<br>(3.6%)    | 0<br>(0.0%)   | 14<br>(4.8%)   | 10<br>(10.5%) | 11<br>(3.9%)    | 5<br>(6.9%)   | 3<br>(1.7%)      | 2<br>(3.3%)   | 2<br>(2.2%)      | 1<br>(7.1%)  | 38<br>(3.6%)   | 18<br>(6.4%)   |
|                             | Structured daily routines                                               | 8<br>(3.6%)    | 0<br>(0.0%)   | 11<br>(3.8%)   | 0<br>(0.0%)   | 7<br>(2.5%)     | 3<br>(4.2%)   | 2<br>(1.2%)      | 3<br>(5.0%)   | 4<br>(4.4%)      | 1<br>(7.1%)  | 32<br>(3.0%)   | 7<br>(2.5%)    |
|                             | Social contacts                                                         | 0<br>(0.0%)    | 0<br>(0.0%)   | 4<br>(1.4%)    | 2<br>(2.1%)   | 7<br>(2.5%)     | 3<br>(4.2%)   | 2<br>(1.2%)      | 1<br>(1.7%)   | 1<br>(1.1%)      | 0<br>(0.0%)  | 14<br>(1.3%)   | 6<br>(2.1%)    |
|                             | Positive statements (e.g. 'quality time with the family')               | 10<br>(4.5%)   | 2<br>(4.8%)   | 20<br>(6.9%)   | 1<br>(1.1%)   | 18<br>(6.4%)    | 6<br>(8.3%)   | 27<br>(15.6%)    | 5<br>(8.3%)   | 26<br>(28.6%)    | 2<br>(14.3%) | 101<br>(9.6%)  | 16<br>(5.7%)   |
| Neutral                     | No lack of care services (e.g. children were too young/old)             | 27<br>(12.2%)  | 4<br>(9.5%)   | 1<br>(0.3%)    | 0<br>(0.0%)   | 0<br>(0.0%)     | 0<br>(0.0%)   | 1<br>(0.6%)      | 0<br>(0.0%)   | 22<br>(24.2%)    | 3<br>(21.4%) | 51<br>(4.8%)   | 7<br>(2.5%)    |
|                             | External Care (Babysitter, childminder)                                 | 16<br>(7.2%)   | 7<br>(16.7%)  | 35<br>(12.1%)  | 15<br>(15.8%) | 22<br>(7.8%)    | 15<br>(20.8%) | 8<br>(4.6%)      | 4<br>(6.7%)   | 0<br>(0.0%)      | 0<br>(0.0%)  | 81<br>(7.7%)   | 41<br>(14.5%)  |
| Negative                    | Increased screen time                                                   | 6<br>(2.7%)    | 0<br>(0.0%)   | 12<br>(4.1%)   | 2<br>(2.1%)   | 3<br>(1.1%)     | 0<br>(0.0%)   | 7<br>(4.0%)      | 1<br>(1.7%)   | 6<br>(6.6%)      | 2<br>(14.3%) | 34<br>(3.2%)   | 5<br>(1.8%)    |
|                             | Parents had to take care (additional workload)                          | 106<br>(47.7%) | 22<br>(52.4%) | 148<br>(51.0%) | 49<br>(51.6%) | 174<br>(61.9%)  | 40<br>(55.6%) | 83<br>(48.0%)    | 33<br>(55.0%) | 18<br>(19.8%)    | 1<br>(7.1%)  | 529<br>(50.0%) | 145<br>(51.2%) |
|                             | Negative statements (e.g. 'it was horrible')                            | 23<br>(10.4%)  | 3<br>(7.1%)   | 41<br>(14.1%)  | 13<br>(13.7%) | 35<br>(12.5%)   | 6<br>(8.3%)   | 21<br>(12.1%)    | 9<br>(15.0%)  | 5<br>(5.5%)      | 2<br>(14.3%) | 125<br>(11.8%) | 33<br>(11.7%)  |

|                           |      |      |        |      |        |  |
|---------------------------|------|------|--------|------|--------|--|
| p-value (chi-square test) | .634 | .136 | <.050* | .458 | <.050* |  |
|---------------------------|------|------|--------|------|--------|--|

**Table S3c.** Free-text answers; coping with the lack of social contacts, detailed. *Note:* \* significant result ( $p < 0.05$ ). <sup>a</sup> the assessment was made according to the overall judgement of the statement in the case of several answers.

| Our Assessment <sup>a</sup> | Lack of social contacts                                     | < 3 years      |               | 3 to < 6 years |               | 6 to < 10 years |               | 10 to < 14 years |               | 14 to < 16 years |               | Total          |                |
|-----------------------------|-------------------------------------------------------------|----------------|---------------|----------------|---------------|-----------------|---------------|------------------|---------------|------------------|---------------|----------------|----------------|
|                             |                                                             | Yes            | No            | Yes            | No            | Yes             | No            | Yes              | No            | Yes              | No            | Yes            | No             |
|                             | At least one child in quarantine?                           |                |               |                |               |                 |               |                  |               |                  |               |                |                |
|                             | N (multiple answers were possible)                          | 271            | 50            | 297            | 94            | 335             | 80            | 302              | 101           | 164              | 33            | 1369           | 358            |
| Positive                    | Reduced real social contacts                                | 30<br>(11.1%)  | 8<br>(16.0%)  | 33<br>(11.1%)  | 9<br>(9.6%)   | 41<br>(12.2%)   | 18<br>(22.5%) | 38<br>(12.6%)    | 22<br>(21.8%) | 7<br>(4.3%)      | 7<br>(21.2%)  | 149<br>(10.9%) | 64<br>(17.9%)  |
|                             | Real social contacts (didn't obey the contact restrictions) | 0<br>(0.0%)    | 1<br>(2.0%)   | 0<br>(0.0%)    | 1<br>(1.1%)   | 1<br>(0.3%)     | 1<br>(1.3%)   | 0<br>(0.0%)      | 0<br>(0.0%)   | 0<br>(0.0%)      | 0<br>(0.0%)   | 1<br>(0.1%)    | 3<br>(0.8%)    |
|                             | Real social contacts in emergency care                      | 3<br>(1.1%)    | 0<br>(0.0%)   | 5<br>(1.7%)    | 1<br>(1.1%)   | 1<br>(0.3%)     | 1<br>(1.3%)   | 0<br>(0.0%)      | 0<br>(0.0%)   | 0<br>(0.0%)      | 0<br>(0.0%)   | 9<br>(0.7%)    | 2<br>(0.6%)    |
|                             | Virtual social contacts (e.g. online)                       | 149<br>(55.0%) | 31<br>(62.0%) | 196<br>(66.0%) | 50<br>(53.2%) | 219<br>(65.4%)  | 29<br>(36.3%) | 193<br>(63.9%)   | 52<br>(51.5%) | 122<br>(74.4%)   | 21<br>(63.6%) | 879<br>(64.2%) | 183<br>(51.1%) |
|                             | Activities with the family (indoors)                        | 82<br>(30.3%)  | 13<br>(26.0%) | 119<br>(40.1%) | 48<br>(51.1%) | 144<br>(43.0%)  | 34<br>(42.6%) | 106<br>(35.1%)   | 48<br>(47.5%) | 53<br>(32.3%)    | 12<br>(36.4%) | 504<br>(36.8%) | 155<br>(43.3%) |
|                             | Activities with the family (outdoors)                       | 16<br>(5.9%)   | 8<br>(16.0%)  | 25<br>(8.4%)   | 26<br>(27.7%) | 36<br>(10.7%)   | 14<br>(17.7%) | 17<br>(5.6%)     | 15<br>(14.9%) | 7<br>(4.3%)      | 5<br>(15.2%)  | 101<br>(7.4%)  | 68<br>(19.0%)  |
|                             | Structured daily routines                                   | 3<br>(1.1%)    | 0<br>(0.0%)   | 4<br>(1.3%)    | 2<br>(2.1%)   | 4<br>(1.2%)     | 2<br>(2.5%)   | 0<br>(0.0%)      | 1<br>(1.0%)   | 0<br>(0.0%)      | 0<br>(0.0%)   | 11<br>(0.8%)   | 5<br>(1.4%)    |
|                             | Positive statements (e.g. 'quality time with the family')   | 7<br>(2.6%)    | 2<br>(4.0%)   | 11<br>(3.7%)   | 4<br>(4.3%)   | 21<br>(6.3%)    | 4<br>(5.0%)   | 19<br>(6.3%)     | 1<br>(1.0%)   | 18<br>(10.1%)    | 3<br>(9.1%)   | 76<br>(5.6%)   | 14<br>(3.9%)   |
| Neutral                     | Too young for social contacts                               | 28<br>(10.3%)  | 2<br>(4.0%)   | 2<br>(0.7%)    | 0<br>(0.0%)   | 0<br>(0.0%)     | 0<br>(0.0%)   | 0<br>(0.0%)      | 0<br>(0.0%)   | 0<br>(0.0%)      | 0<br>(0.0%)   | 30<br>(2.2%)   | 2<br>(0.6%)    |
|                             | More screen time                                            | 2<br>(0.7%)    | 0<br>(0.0%)   | 4<br>(1.3%)    | 1<br>(1.1%)   | 14<br>(4.2%)    | 1<br>(1.3%)   | 23<br>(7.6%)     | 7<br>(6.9%)   | 14<br>(8.5%)     | 2<br>(6.1%)   | 59<br>(4.3%)   | 11<br>(3.1%)   |
| Negative                    | 'Not possible to compensate the lack of social contacts'    | 5<br>(1.8%)    | 3<br>(6.0%)   | 6<br>(2.0%)    | 3<br>(3.2%)   | 8<br>(2.4%)     | 1<br>(1.3%)   | 11<br>(3.6%)     | 4<br>(4.0%)   | 7<br>(4.3%)      | 2<br>(6.1%)   | 37<br>(2.7%)   | 13<br>(3.6%)   |
|                             | Negative statements (e.g. 'it was horrible')                | 32<br>(11.8%)  | 4<br>(8.0%)   | 39<br>(13.1%)  | 8<br>(8.5%)   | 39<br>(11.6%)   | 10<br>(12.6%) | 30<br>(9.9%)     | 12<br>(11.9%) | 9<br>(5.5%)      | 1<br>(3.0%)   | 149<br>(10.9%) | 35<br>(9.8%)   |
| p-value (chi-square test)   |                                                             | .449           |               | .133           |               | <.010*          |               | <.001*           |               | <.010*           |               |                |                |

**Table S3d.** Free-text answers; coping with the lack of social contacts, detailed. *Note:* \* significant result ( $p < 0.05$ ). <sup>a</sup> the assessment was made according to the overall judgement of the statement in the case of several answers.

| Our Assessment <sup>a</sup> | Missing leisure time activities                                                            | < 3 years       |                | 3 to < 6 years  |                | 6 to < 10 years |                | 10 to < 14 years |                | 14 to < 16 years |                | Total           |                 |
|-----------------------------|--------------------------------------------------------------------------------------------|-----------------|----------------|-----------------|----------------|-----------------|----------------|------------------|----------------|------------------|----------------|-----------------|-----------------|
|                             |                                                                                            | Yes             | No             | Yes             | No             | Yes             | No             | Yes              | No             | Yes              | No             | Yes             | No              |
|                             | At least one child in quarantine?                                                          |                 |                |                 |                |                 |                |                  |                |                  |                |                 |                 |
|                             | N (multiple answers were possible)                                                         | 189             | 38             | 246             | 77             | 323             | 82             | 313              | 99             | 154              | 40             | 1225            | 336             |
| Positive                    | Online compensation (e.g. online sports class)                                             | 10<br>(5.3 %)   | 1<br>(2.6 %)   | 39<br>(15.9 %)  | 15<br>(19.5 %) | 69<br>(21.4 %)  | 16<br>(19.5 %) | 74<br>(23.6 %)   | 26<br>(26.3 %) | 30<br>(19.5 %)   | 11<br>(27.5 %) | 222<br>(18.1 %) | 69<br>(20.5 %)  |
|                             | Practised sports/music independently/ with the help of their parents in the house/outdoors | 97<br>(51.3 %)  | 22<br>(57.9 %) | 178<br>(72.4 %) | 53<br>(68.8 %) | 235<br>(72.8 %) | 68<br>(82.9 %) | 185<br>(59.1 %)  | 78<br>(78.8 %) | 79<br>(51.3 %)   | 23<br>(57.5 %) | 779<br>(63.6 %) | 244<br>(72.6 %) |
|                             | Activities with the family (indoors)                                                       | 101<br>(53.4 %) | 17<br>(44.7 %) | 85<br>(34.6 %)  | 22<br>(28.6 %) | 74<br>(22.9 %)  | 21<br>(25.6 %) | 51<br>(16.3 %)   | 20<br>(20.2 %) | 26<br>(26.3 %)   | 8<br>(20.0 %)  | 337<br>(27.5 %) | 88<br>(26.2 %)  |
|                             | Structured daily routines                                                                  | 3<br>(1.6 %)    | 0<br>(0.0 %)   | 1<br>(0.4 %)    | 1<br>(1.3 %)   | 0<br>(0.0 %)    | 2<br>(2.4 %)   | 0<br>(0.0 %)     | 0<br>(0.0 %)   | 0<br>(0.0 %)     | 0<br>(0.0 %)   | 4<br>(0.3 %)    | 3<br>(0.9 %)    |
|                             | Positive statements (e.g. 'quality time with the family')                                  | 6<br>(3.2 %)    | 1<br>(2.6 %)   | 7<br>(2.8 %)    | 3<br>(3.9 %)   | 13<br>(4.0 %)   | 5<br>(6.1 %)   | 15<br>(4.8 %)    | 0<br>(0.0 %)   | 11<br>(7.1 %)    | 6<br>(15.0 %)  | 52<br>(4.2 %)   | 15<br>(4.5 %)   |
|                             | No missing leisure time activities (e.g. too young; no activities before the pandemic)     | 8<br>(4.2 %)    | 0<br>(0.0 %)   | 0<br>(0.0 %)    | 0<br>(0.0 %)   | 1<br>(0.3 %)    | 0<br>(0.0 %)   | 2<br>(0.6 %)     | 2<br>(2.0 %)   | 0<br>(0.0 %)     | 8<br>(20.0 %)  | 11<br>(0.9 %)   | 10<br>(3.0 %)   |
| Neutral                     | Increased screen time                                                                      | 8<br>(4.2 %)    | 0<br>(0.0 %)   | 14<br>(5.7 %)   | 3<br>(3.9 %)   | 17<br>(5.3 %)   | 2<br>(2.4 %)   | 26<br>(8.3 %)    | 7<br>(7.1 %)   | 11<br>(7.1 %)    | 2<br>(5.0 %)   | 77<br>(6.3 %)   | 14<br>(4.2 %)   |
|                             | 'Not possible to compensate the lack of leisure time activities'                           | 4<br>(2.1 %)    | 5<br>(13.2 %)  | 17<br>(6.9 %)   | 7<br>(9.1 %)   | 24<br>(74.3 %)  | 4<br>(4.8 %)   | 31<br>(9.9 %)    | 6<br>(6.1 %)   | 20<br>(13.0 %)   | 4<br>(10.0 %)  | 96<br>(7.8 %)   | 26<br>(7.7 %)   |
|                             | Negative statements (e.g. 'it was horrible')                                               | 25<br>(13.2 %)  | 5<br>(13.2 %)  | 15<br>(6.1 %)   | 6<br>(7.8 %)   | 28<br>(8.7 %)   | 7<br>(8.5 %)   | 29<br>(9.3 %)    | 4<br>(4.0 %)   | 9<br>(5.8 %)     | 1<br>(2.5 %)   | 106<br>(8.7 %)  | 23<br>(6.8 %)   |
| p-value (chi-square test)   |                                                                                            | <.050*          |                | .919            |                | .859            |                | <.050*           |                | .470             |                |                 |                 |

**Table S4.** Baseline Models in multiple linear regressions in terms of children's relative sum score. *Note:*  $\beta$  =  $\beta$ -Regression Coefficient; s.e. = Standard Error; Adj. = Adjusted; vs = versus; IP = infected person; CP = close contact.

| Baseline Model          | Factors                                          | $\beta$ (s.e.) | p-value | R <sup>2</sup> | Adj. R <sup>2</sup> |
|-------------------------|--------------------------------------------------|----------------|---------|----------------|---------------------|
| Children aged <3 years  | Reason for parental quarantine (IP vs CP)        | 0.110 (0.069)  | .036    | 0.200          | 0.174               |
|                         | Age (in years) of parent                         | -0.050 (0.006) | .339    |                |                     |
|                         | Sex of parent (female vs male)                   | 0.087 (0.070)  | .100    |                |                     |
|                         | Migration background (no vs yes)                 | -0.004 (0.113) | .941    |                |                     |
|                         | SES (high vs middle/low)                         | -0.033 (0.096) | .516    |                |                     |
|                         | Living situation (balcony and/or garden vs none) | 0.001 (0.106)  | .977    |                |                     |
|                         | Partnership (yes vs no)                          | 0.003 (0.185)  | .946    |                |                     |
|                         | Brief Resilience Scale parents                   | -0.003 (0.051) | .961    |                |                     |
|                         | Psychological distress score parents             | 0.407 (0.053)  | <.001   |                |                     |
|                         | Coping score parents                             | -0.034 (0.041) | .542    |                |                     |
| Children aged 3-6 years | At least one child in quarantine (yes vs no)     | -0.038 (0.102) | .454    | 0.199          | 0.172               |
|                         | Reason for parental quarantine (IP vs CP)        | 0.106 (0.070)  | <.050   |                |                     |
|                         | Age (in years) of parent                         | -0.044 (0.006) | .400    |                |                     |
|                         | Sex of parent (female vs male)                   | -0.017 (0.070) | .744    |                |                     |
|                         | Migration background (no vs yes)                 | -0.048 (0.130) | .329    |                |                     |
|                         | SES (high vs middle/low)                         | -0.086 (0.098) | .089    |                |                     |
|                         | Living situation (balcony and/or garden vs none) | -0.028 (0.180) | .578    |                |                     |
|                         | Partnership (yes vs no)                          | -0.088 (0.149) | .077    |                |                     |
|                         | Brief Resilience Scale parents                   | -0.137 (0.049) | <.050   |                |                     |
|                         | Psychological distress score parents             | 0.306 (0.054)  | <.001   |                |                     |
|                         | Coping score parents                             | -0.015 (0.040) | .785    |                |                     |
|                         | At least one child in quarantine (yes vs no)     | -0.053 (0.101) | .319    |                |                     |

|                               |                                                  |                |       |       |       |
|-------------------------------|--------------------------------------------------|----------------|-------|-------|-------|
|                               | Reason for parental quarantine (IP vs CP)        | 0.040 (0.064)  | .348  |       |       |
|                               | Age (in years) of parent                         | -0.043 (0.006) | .328  |       |       |
|                               | Sex of parent (female vs male)                   | -0.108 (0.069) | <.050 |       |       |
|                               | Migration background (no vs yes)                 | -0.046 (0.124) | .263  |       |       |
|                               | SES (high vs middle/low)                         | 0.024 (0.087)  | .575  |       |       |
| Children aged 6-<br><10 years | Living situation (balcony and/or garden vs none) | 0.052 (0.150)  | .205  | 0.330 | 0.312 |
|                               | Partnership (yes vs no)                          | -0.002 (0.109) | .953  |       |       |
|                               | Brief Resilience Scale parents                   | -0.017 (0.044) | .714  |       |       |
|                               | Psychological distress score parents             | 0.445 (0.049)  | <.001 |       |       |
|                               | Coping score parents                             | -0.134 (0.037) | <.050 |       |       |
|                               | At least one child in quarantine (yes vs no)     | -0.066 (0.110) | .122  |       |       |
|                               | Reason for parental quarantine (IP vs CP)        | 0.058 (0.064)  | .192  |       |       |
|                               | Age (in years) of parent                         | -0.049 (0.006) | .282  |       |       |
|                               | Sex of parent (female vs male)                   | -0.040 (0.068) | .391  |       |       |
|                               | Migration background (no vs yes)                 | 0.026 (0.117)  | .542  |       |       |
|                               | SES (high vs middle/low)                         | 0.073 (0.081)  | .100  |       |       |
| Children aged<br>10-<14 years | Living situation (balcony and/or garden vs none) | 0.032 (0.154)  | .451  | 0.263 | 0.244 |
|                               | Partnership (yes vs no)                          | -0.080 (0.105) | .065  |       |       |
|                               | Brief Resilience Scale parents                   | -0.055 (0.045) | .245  |       |       |
|                               | Psychological distress score parents             | 0.396 (0.053)  | <.001 |       |       |
|                               | Coping score parents                             | -0.128 (0.038) | <.010 |       |       |
|                               | At least one child in quarantine (yes vs no)     | -0.003 (0.100) | .940  |       |       |
|                               | Reason for parental quarantine (IP vs CP)        | 0.085 (0.084)  | .169  |       |       |
|                               | Age (in years) of parent                         | 0.012 (0.008)  | .846  |       |       |
| Children aged<br>14-<16 years | Sex of parent (female vs male)                   | -0.110 (0.085) | .069  | 0.274 | 0.240 |
|                               | Migration background (no vs yes)                 | 0.085 (0.138)  | .152  |       |       |

|                                                  |                |       |
|--------------------------------------------------|----------------|-------|
| SES (high vs middle/low)                         | -0.004 (0.102) | .948  |
| Living situation (balcony and/or garden vs none) | 0.007 (0.234)  | .901  |
| Partnership (yes vs no)                          | 0.006 (0.120)  | .912  |
| Brief Resilience Scale parents                   | -0.050 (0.055) | .459  |
| Psychological distress score parents             | 0.375 (0.066)  | <.001 |
| Coping score parents                             | -0.157 (0.049) | <.050 |
| At least one child in quarantine (yes vs no)     | -0.104 (0.142) | .077  |

---
